# Supplementary material for: Kinetic study of the electron-transfer oxidation of the phenolate anion of a vitamin E model by molecular oxygen generating superoxide anion in an aprotic mediumElectronic supplementary information (ESI) available: the cyclic voltammogram of 1? and the experimental EPR spectrum of 1? with the computer simulation spectrum. See http://www.rsc.org/suppdata/ob/b3/b306758k/
Source: Royal Society of Chemistry journal article supplement (doi:10.1039/b306758k), 2003-01-01
Supplement: b306758k.doc [file b306758k.doc]

**Supplementary data**

**Fig. S1.** Cyclic voltammogram of **1**– (2.0  10–3 M) in MeCN containing 0.1 M Bu4NClO4 at 298 K at scan rate of 2.0 V s–1 with Pt working electrode.


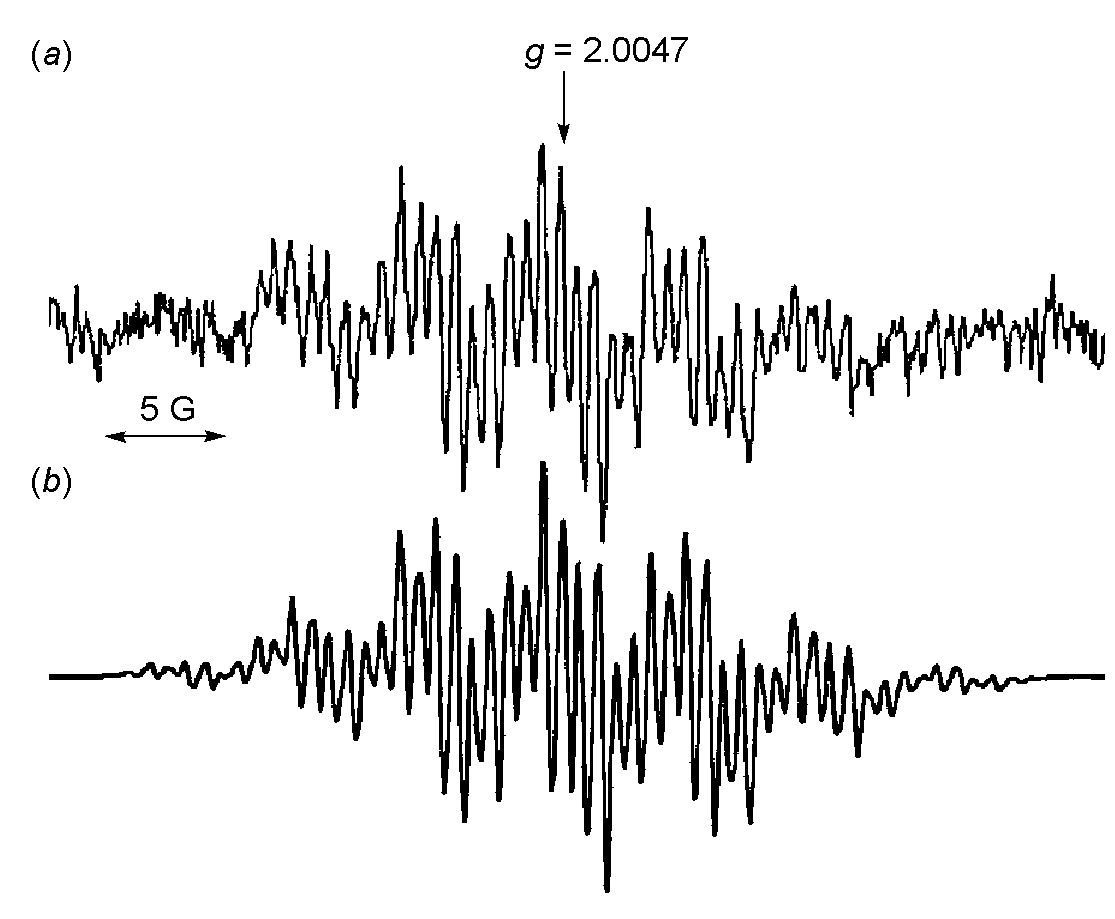


**Fig. S2.** (a) ESR spectrum of **1**• generated by electron-transfer oxidation of **1**– (5.0 10–4 M) by DOPPH• (5.0  10–5 M) in deaerated MeCN at 298 K; (b) the computer simulation spectrum using the hfc values shown in Scheme 1.
